# Supplementary material for: Red Blood Cell Proteasome in Beta-Thalassemia Trait: Topology of Activity and Networking in Blood Bank Conditions
Source: MDPI journal article supplement (doi:10.3390/membranes11090716), 2021-09-17
Supplement: s1 [file s1]

# Supplementary Materials: Red Blood Cell Proteasome in Beta-thalassemia Trait: Topology of Activity and Networking in Blood Bank Conditions

Alkmini T. Anastasiadi <sup>1,†</sup>, Vassilis L. Tzounakas <sup>1,†</sup>, Vasiliki-Zoi Arvaniti <sup>1</sup>, Monika Dzieciatkowska <sup>2</sup>,  
Konstantinos Stamoulis <sup>3</sup>, Marilena E. Lekka <sup>4,\*</sup>, Issidora S. Papassideri <sup>1</sup>, Angelo D'Alessandro <sup>2</sup>,  
Anastasios G. Kriebardis <sup>5</sup> and Marianna H. Antonelou <sup>1,\*</sup>

- <sup>1</sup> Department of Biology, School of Science, National and Kapodistrian University of Athens (NKUA),  
15784 Athens, Greece; alkanast@biol.uoa.gr (A.T.A.); tzounak@biol.uoa.gr (V.L.T.);  
vazoarvaniti@gmail.com (V.-Z.A.); ipapasid@biol.uoa.gr (I.S.P.)
  - <sup>2</sup> Department of Biochemistry and Molecular Genetics, School of Medicine–Anschutz Medical Campus, University of Colorado, Aurora, CO 80045, USA; monika.dzieciatkowska@ucdenver.edu (M.D.);  
ANGELO.DALESSANDRO@UCDENVER.EDU (A.D.)
  - <sup>3</sup> Hellenic National Blood Transfusion Centre, Acharnes, 13677 Athens, Greece; kostas.stamoulis@gmail.com
  - <sup>4</sup> Laboratory of Biochemistry, Department of Chemistry, University of Ioannina, 45110 Ioannina, Greece
  - <sup>5</sup> Laboratory of Reliability and Quality Control in Laboratory Hematology (HemQcR), Department of Biomedical Sciences, School of Health & Welfare Sciences, University of West Attica (UniWA),  
12243 Egaleo, Greece; akrieb@uniwa.gr
- \* Correspondence: manton@biol.uoa.gr (M.H.A.); mlekk@uoi.gr (M.E.L.)  
† These authors contributed equally to this work.

**Table S1.** Numerical code used for the presentation of proteomic and physiological parameters in the biological networks shown in Figures 3–7.

| Parameter                                       | Abbreviation |
|-------------------------------------------------|--------------|
| 14-3-3 protein epsilon                          | 1            |
| 2',3'-cyclic-nucleotide 3'-phosphodiesterase    | 2            |
| 26S proteasome non-ATPase regulatory subunit 1  | 3            |
| 26S proteasome non-ATPase regulatory subunit 11 | 4            |
| 26S proteasome non-ATPase regulatory subunit 12 | 5            |
| 26S proteasome non-ATPase regulatory subunit 13 | 6            |
| 26S proteasome non-ATPase regulatory subunit 14 | 7            |
| 26S proteasome non-ATPase regulatory subunit 2  | 8            |
| 26S proteasome non-ATPase regulatory subunit 3  | 9            |
| 26S proteasome non-ATPase regulatory subunit 5  | 10           |
| 26S proteasome non-ATPase regulatory subunit 6  | 11           |
| 26S proteasome non-ATPase regulatory subunit 7  | 12           |
| 26S proteasome non-ATPase regulatory subunit 8  | 13           |
| 26S proteasome regulatory subunit 10B           | 14           |

|                                            |    |
|--------------------------------------------|----|
| 26S proteasome regulatory subunit 4        | 15 |
| 26S proteasome regulatory subunit 6A       | 16 |
| 26S proteasome regulatory subunit 6B       | 17 |
| 26S proteasome regulatory subunit 7        | 18 |
| 26S proteasome regulatory subunit 8        | 19 |
| 55 kDa erythrocyte membrane protein        | 20 |
| Acetylcholinesterase                       | 21 |
| Actin, alpha skeletal muscle               | 22 |
| Actin, cytoplasmic 1                       | 23 |
| Acylamino-acid-releasing enzyme            | 24 |
| Aldehyde dehydrogenase family 16 member A1 | 25 |
| Alpha-adducin                              | 26 |
| Alpha-centractin                           | 27 |
| Ammonium transporter Rh type A             | 28 |
| Ankyrin-1                                  | 29 |
| Annexin A4                                 | 30 |
| Annexin A7                                 | 31 |
| AP-1 complex subunit beta-1                | 32 |
| AP-2 complex subunit alpha-1               | 33 |
| AP-2 complex subunit alpha-2               | 34 |
| AP-2 complex subunit beta                  | 35 |
| AP-2 complex subunit mu                    | 36 |
| Aquaporin-1                                | 37 |
| Arginase-1                                 | 38 |
| Atlastin-3                                 | 39 |
| ATP-binding cassette sub-family B member 6 | 40 |
| ATP-binding cassette sub-family G member 2 | 41 |
| ATP-citrate synthase                       | 42 |
| ATP-dependent 6-phosphofructokinase        | 43 |
| ATP-dependent 6-phosphofructokinase        | 44 |
| Band 3 anion transport protein             | 45 |
| Basal cell adhesion molecule               | 46 |
| Basigin                                    | 47 |
| Beta-2-glycoprotein 1                      | 48 |
| Beta-actin-like protein 2                  | 49 |
| Beta-adducin                               | 50 |
| Blood group Rh(CE) polypeptide             | 51 |
| BMP-2-inducible protein kinase             | 52 |
| C-1-tetrahydrofolate synthase, cytoplasmic | 53 |
| Calmodulin-1                               | 54 |
| Calnexin                                   | 55 |
| Calpain small subunit 1                    | 56 |
| Calpain-1 catalytic subunit                | 57 |
| Calpain-5                                  | 58 |
| Calpastatin                                | 59 |
| Calreticulin                               | 60 |

|                                                               |     |
|---------------------------------------------------------------|-----|
| cAMP-dependent protein kinase catalytic subunit alpha         | 61  |
| cAMP-dependent protein kinase type I-alpha regulatory subunit | 62  |
| Carbonic anhydrase 1                                          | 63  |
| Casein kinase I isoform alpha                                 | 64  |
| Caspase-like activity (cytosol)                               | 65  |
| Caspase-like activity (membrane)                              | 66  |
| Caspase-like activity (supernatant)                           | 67  |
| Catalase                                                      | 68  |
| CB1 cannabinoid receptor-interacting protein 1                | 69  |
| CD44 antigen                                                  | 70  |
| CD59 glycoprotein                                             | 71  |
| Cell division control protein 42 homolog                      | 72  |
| Chymotrypsin-like activity (cytosol)                          | 73  |
| Chymotrypsin-like activity (membrane)                         | 74  |
| Chymotrypsin-like activity (supernatant)                      | 75  |
| Clathrin heavy chain 1                                        | 76  |
| Coiled-coil and C2 domain-containing protein 1A               | 77  |
| Complement decay-accelerating factor                          | 78  |
| Complement receptor type 1                                    | 79  |
| COP9 signalosome complex subunit 2                            | 80  |
| COP9 signalosome complex subunit 3                            | 81  |
| COP9 signalosome complex subunit 4                            | 82  |
| COP9 signalosome complex subunit 6                            | 83  |
| Copine-3                                                      | 84  |
| Copper-transporting ATPase 1                                  | 85  |
| Cullin-1                                                      | 86  |
| Cullin-associated NEDD8-dissociated protein 1                 | 87  |
| Delta-aminolevulinic acid dehydratase                         | 88  |
| Dematin                                                       | 89  |
| Deoxyribose-phosphate aldolase                                | 90  |
| Diamide-induced ROS generation                                | 91  |
| Disheveled-associated activator of morphogenesis 1            | 92  |
| DnaJ homolog subfamily B member 1                             | 93  |
| DnaJ homolog subfamily C member 13                            | 94  |
| Dynactin subunit 1                                            | 95  |
| Dynactin subunit 2                                            | 96  |
| Dynamin-2                                                     | 97  |
| E2 ubiquitin-conjugating enzyme                               | 98  |
| E3 ubiquitin-protein ligase HUWE1                             | 99  |
| E3 ubiquitin-protein ligase UBR4                              | 100 |
| Elongation factor 1-alpha                                     | 101 |
| Endonuclease domain-containing 1 protein                      | 102 |
| Endoplasmic reticulum chaperone BiP                           | 103 |
| Endoplasmic reticulum resident protein 44                     | 104 |
| Endoplasmin                                                   | 105 |
| Epoxide hydrolase 1                                           | 106 |

|                                                                      |     |
|----------------------------------------------------------------------|-----|
| Equilibrative nucleoside transporter 1                               | 107 |
| Erythrocyte band 7 integral membrane protein                         | 108 |
| Erythrocyte membrane protein band 4.2                                | 109 |
| Erythroid membrane-associated protein                                | 110 |
| Exportin-7                                                           | 111 |
| Extracellular potassium levels                                       | 112 |
| Extracellular sodium levels                                          | 113 |
| Extracellular vesicles' procoagulant activity                        | 114 |
| Ezrin                                                                | 115 |
| F-actin-capping protein subunit alpha-1                              | 116 |
| F-actin-capping protein subunit beta                                 | 117 |
| Fatty acid synthase                                                  | 118 |
| Flavin reductase (NADPH)                                             | 119 |
| Flotillin-1                                                          | 120 |
| Flotillin-2                                                          | 121 |
| Fructose-bisphosphate aldolase A                                     | 122 |
| Fructose-bisphosphate aldolase C                                     | 123 |
| G protein-coupled receptor kinase 6                                  | 124 |
| Galectin-3                                                           | 125 |
| Gamma-adducin                                                        | 126 |
| Glutathione S-transferase LANCL1                                     | 127 |
| Glyceraldehyde-3-phosphate dehydrogenase                             | 128 |
| Glycophorin-A                                                        | 129 |
| Glycophorin-C                                                        | 130 |
| GMP reductase 1                                                      | 131 |
| Golgi-associated plant pathogenesis-related protein 1                | 132 |
| GTPase KRas                                                          | 133 |
| GTPase NRas                                                          | 134 |
| GTPase-activating protein and VPS9 domain-containing protein 1       | 135 |
| Guanine nucleotide-binding protein G(i) subunit alpha-2              | 136 |
| Guanine nucleotide-binding protein G(I)/G(S)/G(T) subunit beta-1     | 137 |
| Guanine nucleotide-binding protein G(I)/G(S)/G(T) subunit beta-2     | 138 |
| Guanine nucleotide-binding protein G(k) subunit alpha                | 139 |
| Guanine nucleotide-binding protein G(q) subunit alpha                | 140 |
| Guanine nucleotide-binding protein G(s) subunit alpha isoforms short | 141 |
| Guanine nucleotide-binding protein subunit alpha-13                  | 142 |
| Heat shock 70 kDa protein 1A                                         | 143 |
| Heat shock 70 kDa protein 4                                          | 144 |
| Heat shock cognate 71 kDa protein                                    | 145 |
| Heat shock protein HSP 90-alpha                                      | 146 |
| Heat shock protein HSP 90-beta                                       | 147 |
| Hematocrit                                                           | 148 |
| Hemoglobin subunit alpha                                             | 149 |
| Hemoglobin subunit beta                                              | 150 |
| Hemoglobin subunit delta                                             | 151 |

|                                                                        |     |
|------------------------------------------------------------------------|-----|
| Hsc70-interacting protein                                              | 152 |
| Immunoglobulin gamma-1 heavy chain                                     | 153 |
| Immunoglobulin heavy constant gamma 2                                  | 154 |
| Immunoglobulin heavy constant gamma 3                                  | 155 |
| Immunoglobulin heavy constant mu                                       | 156 |
| Immunoglobulin kappa constant                                          | 157 |
| Immunoglobulin kappa light chain                                       | 158 |
| Immunoglobulin lambda-like polypeptide 5                               | 159 |
| Importin subunit beta-1                                                | 160 |
| Importin-5                                                             | 161 |
| Importin-7                                                             | 162 |
| Intercellular adhesion molecule 4                                      | 163 |
| Intermediate conductance calcium-activated potassium channel protein 4 | 164 |
| Intracellular calcium levels                                           | 165 |
| Intracellular hemoglobin                                               | 166 |
| Intrinsic ROS generation                                               | 167 |
| Irreversible RBC shape transformation (percentage)                     | 168 |
| Junctional adhesion molecule A                                         | 169 |
| Kell blood group glycoprotein                                          | 170 |
| Keratin, type I cytoskeletal 10                                        | 171 |
| Keratin, type I cytoskeletal 9                                         | 172 |
| Keratin, type II cytoskeletal 1                                        | 173 |
| Keratin, type II cytoskeletal 2                                        | 174 |
| Keratin, type II cytoskeletal 6A                                       | 175 |
| LanC-like protein 2                                                    | 176 |
| L-lactate dehydrogenase B chain                                        | 177 |
| Long-chain-fatty-acid--CoA ligase 3                                    | 178 |
| Long-chain-fatty-acid--CoA ligase 4                                    | 179 |
| Long-chain-fatty-acid--CoA ligase 6                                    | 180 |
| Lymphocyte function-associated antigen 3                               | 181 |
| Mean Cell Volume (MCV)                                                 | 182 |
| Mean Corpuscular Fragility (MCF)                                       | 183 |
| Mean Corpuscular Hemoglobin (MCH)                                      | 184 |
| Mean Corpuscular Hemoglobin Concentration (MCHC)                       | 185 |
| Mechanical Fragility                                                   | 186 |
| Membrane Lipid Peroxidation                                            | 187 |
| Methyltransferase-like protein 7A                                      | 188 |
| Moesin                                                                 | 189 |
| Monocarboxylate transporter 1                                          | 190 |
| Multidrug resistance-associated protein 1                              | 191 |
| Multidrug resistance-associated protein 4                              | 192 |
| Multidrug resistance-associated protein 5                              | 193 |
| Multiple inositol polyphosphate phosphatase 1                          | 194 |
| Myosin light chain 4                                                   | 195 |
| Myosin regulatory light chain 12B                                      | 196 |

|                                                            |     |
|------------------------------------------------------------|-----|
| Myosin-10                                                  | 197 |
| Myosin-9                                                   | 198 |
| NADH-cytochrome b5 reductase 3                             | 199 |
| Neuropathy target esterase                                 | 200 |
| Neutral alpha-glucosidase AB                               | 201 |
| Neutral cholesterol ester hydrolase 1                      | 202 |
| Nucleosome assembly protein 1-like 1                       | 203 |
| Nucleosome assembly protein 1-like 4                       | 204 |
| Oxidative hemolysis                                        | 205 |
| Peptidyl-prolyl cis-trans isomerase B                      | 206 |
| Peptidyl-prolyl cis-trans isomerase FKBP3                  | 207 |
| Peroxiredoxin-1                                            | 208 |
| Peroxiredoxin-2                                            | 209 |
| Phenylhydrazine-induced ROS generation                     | 210 |
| Phosphatidylinositol phosphatase SAC1                      | 211 |
| Phosphatidylinositol 4-kinase type 2-alpha                 | 212 |
| Phosphatidylinositol 5-phosphate 4-kinase type-2 alpha     | 213 |
| Phosphatidylinositol-binding clathrin assembly protein     | 214 |
| Phosphatidylserine exposure                                | 215 |
| Phospholipid scramblase 1                                  | 216 |
| Phospholipid transfer protein C2CD2L                       | 217 |
| Phosphoribosyl pyrophosphate synthase-associated protein 2 | 218 |
| Piezo-type mechanosensitive ion channel component 1        | 219 |
| Plasma membrane calcium-transporting ATPase 1              | 220 |
| Plasma membrane calcium-transporting ATPase 4              | 221 |
| Polypyrimidine tract-binding protein 1                     | 222 |
| Polyubiquitin-B                                            | 223 |
| Probable ubiquitin carboxyl-terminal hydrolase FAF-X       | 224 |
| Proteasome activator complex subunit 1                     | 225 |
| Proteasome activator complex subunit 2                     | 226 |
| Proteasome adapter and scaffold protein ECM29              | 227 |
| Proteasome subunit alpha type-1                            | 228 |
| Proteasome subunit alpha type-2                            | 229 |
| Proteasome subunit alpha type-3                            | 230 |
| Proteasome subunit alpha type-4                            | 231 |
| Proteasome subunit alpha type-5                            | 232 |
| Proteasome subunit alpha type-6                            | 233 |
| Proteasome subunit alpha type-7                            | 234 |
| Proteasome subunit beta type-1                             | 235 |
| Proteasome subunit beta type-2                             | 236 |
| Proteasome subunit beta type-3                             | 237 |
| Proteasome subunit beta type-4                             | 238 |
| Proteasome subunit beta type-5                             | 239 |
| Proteasome subunit beta type-7                             | 240 |
| Protein 4.1                                                | 241 |
| Protein arginine N-methyltransferase 5                     | 242 |

|                                                                   |     |
|-------------------------------------------------------------------|-----|
| Protein argonaute-2                                               | 243 |
| Protein carbonylation                                             | 244 |
| Protein DDI1 homolog 2                                            | 245 |
| Protein diaphanous homolog 1                                      | 246 |
| Protein disulfide-isomerase                                       | 247 |
| Protein disulfide-isomerase A3                                    | 248 |
| Protein disulfide-isomerase A6                                    | 249 |
| Protein XRP2                                                      | 250 |
| Pyrroline-5-carboxylate reductase 3                               | 251 |
| Radixin                                                           | 252 |
| Ras-related C3 botulinum toxin substrate 1                        | 253 |
| Ras-related protein Rab-10                                        | 254 |
| Ras-related protein Rab-18                                        | 255 |
| Ras-related protein Rab-21                                        | 256 |
| Ras-related protein Rab-2B                                        | 257 |
| Ras-related protein Rab-35                                        | 258 |
| Ras-related protein Rab-5C                                        | 259 |
| Ras-related protein Rab-7a                                        | 260 |
| Ras-related protein Rab-8A                                        | 261 |
| Ras-related protein Rab-8B                                        | 262 |
| Ras-related protein Ral-A                                         | 263 |
| Ras-related protein Rap-1A                                        | 264 |
| Ras-related protein Rap-1b                                        | 265 |
| Ras-related protein Rap-2a                                        | 266 |
| Ras-related protein Rap-2b                                        | 267 |
| Red blood cell count (RBC)                                        | 268 |
| Red cell distribution width (RDW)                                 | 269 |
| Retinal dehydrogenase 1                                           | 270 |
| Ribose-phosphate pyrophosphokinase 1                              | 271 |
| RuvB-like 1                                                       | 272 |
| RuvB-like 2                                                       | 273 |
| Semaphorin-7A                                                     | 274 |
| Serum albumin                                                     | 275 |
| SH3 domain-binding glutamic acid-rich-like protein                | 276 |
| SH3 domain-binding glutamic acid-rich-like protein 2              | 277 |
| Small integral membrane protein 1                                 | 278 |
| Small membrane A-kinase anchor protein                            | 279 |
| Sodium/potassium-transporting ATPase subunit alpha-1              | 280 |
| Solute carrier family 2, facilitated glucose transporter member 1 | 281 |
| Solute carrier family 40 member 1                                 | 282 |
| Sorbitol dehydrogenase                                            | 283 |
| Spectrin alpha chain, erythrocytic 1                              | 284 |
| Spectrin beta chain, erythrocytic                                 | 285 |
| Storage hemolysis                                                 | 286 |
| Stress-induced-phosphoprotein 1                                   | 287 |
| Syntaxin-7                                                        | 288 |

|                                                          |     |
|----------------------------------------------------------|-----|
| Syntaxin-binding protein 3                               | 289 |
| TBC1 domain family member 24                             | 290 |
| T-complex protein 1 subunit alpha                        | 291 |
| T-complex protein 1 subunit beta                         | 292 |
| T-complex protein 1 subunit delta                        | 293 |
| T-complex protein 1 subunit epsilon                      | 294 |
| T-complex protein 1 subunit eta                          | 295 |
| T-complex protein 1 subunit gamma                        | 296 |
| T-complex protein 1 subunit theta                        | 297 |
| T-complex protein 1 subunit zeta                         | 298 |
| Tensin-1                                                 | 299 |
| tert-butyl-hydroperoxide induced ROS generation          | 300 |
| Total antioxidant capacity (supernatant)                 | 301 |
| Transforming protein RhoA                                | 302 |
| Transitional endoplasmic reticulum ATPase                | 303 |
| Transmembrane emp24 domain-containing protein 2          | 304 |
| Transmembrane protein 222                                | 305 |
| Tripeptidyl-peptidase 2                                  | 306 |
| Tropomodulin-1                                           | 307 |
| Tropomyosin alpha-1 chain                                | 308 |
| Tropomyosin alpha-3 chain                                | 309 |
| Trypsin-like activity (cytosol)                          | 310 |
| Trypsin-like activity (membrane)                         | 311 |
| Trypsin-like activity (supernatant)                      | 312 |
| Ubiquitin carboxyl-terminal hydrolase 14                 | 313 |
| Ubiquitin carboxyl-terminal hydrolase 15                 | 314 |
| Ubiquitin carboxyl-terminal hydrolase 5                  | 315 |
| UDP-glucose:glycoprotein glucosyltransferase 1           | 316 |
| Unconventional myosin-XVIIIa                             | 317 |
| Urea transporter 1                                       | 318 |
| Uric acid dependent antioxidant capacity (supernatant)   | 319 |
| Uric acid independent antioxidant capacity (supernatant) | 320 |
| Vacuolar protein sorting-associated protein 13A          | 321 |
| Very-long-chain 3-oxoacyl-CoA reductase                  | 322 |
| Vesicle-associated membrane protein 3                    | 323 |
| Vesicle-associated membrane protein-associated protein A | 324 |
| Vesicle-fusing ATPase                                    | 325 |
| Vesicle-trafficking protein SEC22b                       | 326 |
| Vesicular integral-membrane protein VIP36                | 327 |
| V-type proton ATPase subunit B                           | 328 |
| WD repeat-containing protein 81                          | 329 |
| WD repeat-containing protein 91                          | 330 |
| Zinc transporter 1                                       | 331 |

---
